# Supplementary material for: Racial and Ethnic Disparities in Lung Cancer Screening by the 2021 USPSTF Guidelines Versus Risk-Based Criteria: The Multiethnic Cohort Study
Source: PubMed Central journal article supplement — JNCI Cancer Spectr. 2022 May 10;6(3):pkac033. doi: 10.1093/jncics/pkac033 (PMC9156850; doi:10.1093/jncics/pkac033), 2022-05-10
Supplement: pkac033_supplementary_data.pdf [file pkac033_supplementary_data.pdf]

# Supplementary Materials

## Supplementary Methods

**Supplementary Table 1.** Characteristics of Participants Evaluated using Baseline versus Follow-Up Smoking Data.

**Supplementary Table 2.** PLCO<sub>m2012</sub> Model for Prediction of 6-Year Lung Cancer Risk Variables, Odds Ratios, and Beta Coefficients.

**Supplementary Table 3.** Missing Rates of Variables in the USPSTF Criteria and PLCO<sub>m2012</sub> Model among All Ever-Smoking Lung Cancer Cases in MEC and in the Primary Study Cohort.

**Supplementary Table 4.** Characteristics of Participants with Complete or Missing Data in the Primary Study Cohort.

**Supplementary Table 5.** 2013 USPSTF Criteria Eligibility (i.e., Screening Sensitivity) and Sources of Ineligibility among All and Ineligible Lung Cancer Cases by Race and Ethnicity.

**Supplementary Table 6.** Screening Eligibilities (i.e., Screening Sensitivities) and Racial and Ethnic Disparities through Risk-Based Screening and the USPSTF Criteria Among Complete Cases.

**Supplementary Table 7.** Screening Eligibilities (i.e., Screening Sensitivities) and Racial and Ethnic Disparities through Risk-Based Screening and the USPSTF Criteria Utilizing a Conservative COPD Analysis in the Primary Study Cohort.

**Supplementary Table 8.** Screening Eligibilities (i.e., Screening Sensitivities) and Racial and Ethnic Disparities through Risk-Based Screening and the USPSTF Criteria in the Primary Study Cohort Using a Modified PLCO<sub>m2012</sub> Model.

**Supplementary Table 9.** Screening Eligibilities (i.e., Screening Sensitivities) and Racial and Ethnic Disparities through Risk-Based Screening and the USPSTF Criteria in the Primary Study Cohort 6 Years Prior to Lung Cancer Diagnosis Using a Modified PLCO<sub>m2012</sub> Model.

# Supplementary Methods

## Participants with Updated Smoking-Related Data

In this study, tobacco smoking-related data were obtained from the Multiethnic Cohort (MEC) baseline questionnaire that was administered from 1993-1996. Ten years after participants completed this questionnaire, a follow-up questionnaire was administered that solicited updated smoking-related information (2003-2008). Among 5,900 subjects included in the primary analyses, 1,526 (25.9%) provided updated smoking data through the follow-up questionnaire before their lung cancer diagnoses. As these data would more accurately reflect participants' smoking status closer to lung cancer diagnosis, we used the updated smoking information for these 1,526 participants in the primary analysis. The characteristics of these participants are summarized in **Supplementary Table 1**.

## Smoking-Related Variables

Smoking-related information collected from the MEC questionnaires included the following variables: smoking status, smoking duration, cigarettes per day, and quit years (i.e., years since smoking cessation). Smoking status was categorized as never (i.e., less than 20 packs of cigarettes in lifetime), current, or former. Smoking duration was categorized as 10 years or less, 11-20 years, 21-30 years, 31-40 years, or 41 years or more. Cigarettes smoked per day were categorized as 5 cigarettes or less, 6-10 cigarettes, 11-20 cigarettes, 21-30 cigarettes, or 31 cigarettes or more. Quit years were classified as less than 1 year, 1-2 years, 3-5 years, 6-10 years, 11-15 years, 16-20 years, or 21 years or more.

Given that the study analyses required the quantification of each individual's cigarettes smoked per day, quit years, and smoking duration, these data were converted to quantitative variables from categorical variables through the following approach: (i) the middle number in each category was selected if within a range (e.g., selected 15.5 from the 11-20 cigarettes per day category), (ii) the upper or lower limit was selected if it was inclusive in the lowest or highest categories, respectively (e.g., selected 5 from the 5 cigarettes per day or less category), or (iii) selected 0.5 if "less than 1 year" was chosen for smoking quit years. Smoking-pack years were calculated by converting the number of cigarettes smoked per day into packs and multiplying by the smoking duration.

The smoking variables in this study include two that are time-dependent: smoking pack-years and quit years. Given the temporal gap between the assessment of a participant's smoking behavior (at enrollment or 10-year follow-up) and the lung cancer diagnosis, we projected the time from smoking assessment to diagnosis to attain the final smoking parameters for determining screening eligibility. This assumes that the smoking behavior was maintained during this timeframe.

## **Chronic Obstructive Pulmonary Disease (COPD) Status**

Data on COPD status were collected via linkage to Centers for Medicare & Medicaid Services claims between 1996 and 2016 (Setiawan et al., *Am J Epidemiol* 2015). Participants who were at least 65 years of age by 2016 were linked to Medicare records by their Social Security number, sex, and date of birth. The presence of COPD was determined using diagnosis codes in the International Classification of Diseases 9<sup>th</sup> (490.0-496.0) and 10<sup>th</sup> revisions (J40-J47) through the following approach:  $\geq 1$  diagnosis code in inpatient claims (the Medicare Provider Analysis and Review File), or  $\geq 2$  diagnosis codes in outpatient or carrier claims over a 1-year period between 1999 and 2016.

**Supplementary Table 1.** Characteristics of Participants Evaluated using Baseline versus Follow-Up Smoking Data.

| Characteristic                       | Baseline Data<br>(N=4,374) | Follow-up Data<br>(N=1,526) |
|--------------------------------------|----------------------------|-----------------------------|
| Age at diagnosis (years), mean (SD)  | 72.9 (8.1)                 | 77.7 (7.4)                  |
| BMI (kg/m <sup>2</sup> ), mean (SD)  | 26.0 (4.8)                 | 26.2 (4.6)                  |
| Sex, N (%)                           |                            |                             |
| Male                                 | 2,610 (59.7)               | 913 (59.8)                  |
| Female                               | 1,764 (40.3)               | 613 (40.2)                  |
| Race and ethnicity, N (%)            |                            |                             |
| African American                     | 1,338 (30.6)               | 322 (21.1)                  |
| Japanese American                    | 920 (21.0)                 | 408 (26.7)                  |
| Latino                               | 564 (12.9)                 | 236 (15.5)                  |
| Native Hawaiian                      | 402 (9.2)                  | 131 (8.6)                   |
| White                                | 1,150 (26.3)               | 429 (28.1)                  |
| Education, N (%)                     |                            |                             |
| High school or less                  | 2,359 (53.9)               | 655 (42.9)                  |
| Some college or graduate             | 1,677 (38.3)               | 705 (46.2)                  |
| Postgraduate                         | 322 (7.4)                  | 164 (10.7)                  |
| Unknown                              | 16 (0.4)                   | 2 (0.1)                     |
| Personal history of cancer, N (%)    |                            |                             |
| No                                   | 3,285 (75.1)               | 1,088 (71.3)                |
| Yes                                  | 1,089 (24.9)               | 438 (28.7)                  |
| Family history of lung cancer, N (%) |                            |                             |
| No                                   | 3,983 (91.1)               | 1,386 (90.8)                |
| Yes                                  | 391 (8.9)                  | 140 (9.2)                   |
| COPD, N (%)                          |                            |                             |
| No                                   | 789 (18.0)                 | 428 (28.0)                  |
| Yes                                  | 1,067 (24.4)               | 461 (30.2)                  |
| Unknown                              | 2,518 (57.6)               | 637 (41.7)                  |
| Smoking status, N (%)                |                            |                             |
| Former                               | 1,996 (45.6)               | 1,075 (70.4)                |
| Current                              | 2,378 (54.4)               | 451 (29.6)                  |
| Pack-years, mean (SD)                | 29.4 (17.6)                | 35.8 (20.1)                 |
| Cigarettes per day, mean (SD)        | 17.7 (8.3)                 | 18.0 (9.9)                  |
| Quit years, median (IQR)             | 0 (0-8)                    | 6.3 (0-22)                  |

Abbreviations: *N* sample size, *SD* standard deviation, *BMI* body mass index, *kg* kilogram, *m* meter, *COPD* chronic obstructive pulmonary disease, *IQR* interquartile range.

**Supplementary Table 2.** PLCO<sub>m2012</sub> Model for Prediction of 6-Year Lung Cancer Risk Variables, Odds Ratios, and Beta Coefficients.

| Variable                                                          | Odds Ratio (95% CI)   | Beta Coefficient  |
|-------------------------------------------------------------------|-----------------------|-------------------|
| Age, per 1-year increase, centered on 62                          | 1.081 (1.057-1.105)   | 0.0778868         |
| Race or ethnic group                                              |                       |                   |
| White (non-Hispanic)                                              | 1.000 (reference)     | 0.000 (reference) |
| Black (non-Hispanic)                                              | 1.484 (1.083-2.033)   | 0.3944778         |
| Hispanic                                                          | 0.475 (0.195-1.160)   | -0.7434744        |
| Asian                                                             | 0.627 (0.332-1.185)   | -0.466585         |
| American Indian or Alaskan Native                                 | 1.000                 | 0.000             |
| Native Hawaiian or Pacific Islander                               | 2.793 (0.992-7.862)   | 1.027152          |
| Education, per 1-level increase, centered on level 4 <sup>a</sup> | 0.922 (0.874-0.972)   | -0.0812744        |
| Body mass index, per 1-unit increase, centered on 27              | 0.973 (0.955-0.991)   | -0.0274194        |
| Chronic obstructive pulmonary disease                             |                       |                   |
| No                                                                | 1.000 (reference)     | 0.000 (reference) |
| Yes                                                               | 1.427 (1.162-1.751)   | 0.3553063         |
| Personal history of cancer                                        |                       |                   |
| No                                                                | 1.000 (reference)     | 0.000 (reference) |
| Yes                                                               | 1.582 (1.172-2.128)   | 0.4589971         |
| Family history of lung cancer                                     |                       |                   |
| No                                                                | 1.000 (reference)     | 0.000 (reference) |
| Yes                                                               | 1.799 (1.471-2.200)   | 0.587185          |
| Smoking status                                                    |                       |                   |
| Former                                                            | 1.000 (reference)     | 0.000 (reference) |
| Current                                                           | 1.297 (1.047-1.605)   | 0.2597431         |
| Smoking intensity <sup>b</sup>                                    | See note <sup>c</sup> | -1.822606         |
| Duration of smoking, per 1-year increase, centered on 27          | 1.032 (1.014-1.051)   | 0.0317321         |
| Smoking quit time, per 1-year increase, centered on 10            | 0.970 (0.950-0.990)   | -0.0308572        |
| Model constant                                                    |                       | -4.532506         |

Abbreviation: *CI* confidence interval.

<sup>a</sup> Education is measured in six ordinal levels: less than high-school graduate (level 1), high-school graduate (level 2), some training after high school (level 3), some college (level 4), college graduate (level 5), and postgraduate or professional degree (level 6). For this study, participants who had a high school education or less were assigned to level 2, some college or college graduate education were assigned to level 5, and postgraduate education were assigned to level 6.

<sup>b</sup> Smoking intensity is calculated by dividing the number of cigarettes smoked per day by 10, exponentiating by the power  $-1$ , centering by subtracting 0.4021541613, and then multiplying this number by the beta coefficient of the variable.

<sup>c</sup> Smoking intensity is non-linear; thus, the association is not represented by the single odds ratio.

**Supplementary Table 3.** Missing Rates of Variables in the USPSTF Criteria and PLCO<sub>m2012</sub> Model among All Ever-Smoking Lung Cancer Cases in MEC and in the Primary Study Cohort.

| Variable                      | N (%)         |
|-------------------------------|---------------|
| All Ever-Smoking Cases        | Total N=6,372 |
| Age at diagnosis              | 0 (0.0)       |
| Race and ethnicity            | 0 (0.0)       |
| Education                     | 33 (0.5)      |
| BMI                           | 77 (1.2)      |
| COPD                          | 3,387 (53.2)  |
| Personal history of cancer    | 0 (0.0)       |
| Family history of lung cancer | 0 (0.0)       |
| Smoking status                | 0 (0.0)       |
| Smoking pack-years            | 133 (2.1)     |
| Smoking intensity             | 77 (1.2)      |
| Smoking duration              | 166 (2.6)     |
| Years since smoking cessation | 48 (0.8)      |
| Primary Study Cohort          | Total N=5,900 |
| Age at diagnosis              | 0 (0.0)       |
| Race and ethnicity            | 0 (0.0)       |
| Education                     | 18 (0.3)      |
| BMI                           | 66 (1.1)      |
| COPD                          | 3,155 (53.5)  |
| Personal history of cancer    | 0 (0.0)       |
| Family history of lung cancer | 0 (0.0)       |
| Smoking status                | 0 (0.0)       |
| Smoking pack-years            | 0 (0.0)       |
| Smoking intensity             | 0 (0.0)       |
| Smoking duration              | 0 (0.0)       |
| Years since smoking cessation | 0 (0.0)       |

Abbreviations: *USPSTF* United States Preventive Services Task Force, *MEC* Multiethnic Cohort, *N* sample size, *BMI* body mass index, *COPD* chronic obstructive pulmonary disease.

**Supplementary Table 4. Characteristics of Participants with Complete or Missing Data in the Primary Study Cohort.**

| Characteristic                                    | Education                  |                        |                       | BMI                        |                        |                       | COPD                       |                           |                       |
|---------------------------------------------------|----------------------------|------------------------|-----------------------|----------------------------|------------------------|-----------------------|----------------------------|---------------------------|-----------------------|
|                                                   | Complete Data<br>(N=5,882) | Missing Data<br>(N=18) | <i>p</i> <sup>a</sup> | Complete Data<br>(N=5,834) | Missing Data<br>(N=66) | <i>p</i> <sup>a</sup> | Complete Data<br>(N=2,745) | Missing Data<br>(N=3,155) | <i>p</i> <sup>a</sup> |
| Age at diagnosis (years), mean (SD)               | 74.2 (8.2)                 | 74.6 (10.0)            | 0.82                  | 74.1 (8.2)                 | 77.9 (7.0)             | <0.001                | 75.8 (6.9)                 | 72.8 (9.0)                | <0.001                |
| BMI (kg/m <sup>2</sup> ) <sup>b</sup> , mean (SD) | 26.0 (4.7)                 | 26.2 (5.9)             | 0.87                  | 26.0 (4.7)                 | NE                     | NE                    | 26.1 (4.7)                 | 26.0 (4.7)                | 0.20                  |
| Sex, N (%)                                        |                            |                        | 0.91                  |                            |                        | 0.03                  |                            |                           | 0.65                  |
| Male                                              | 3,513 (59.7)               | 10 (55.6)              |                       | 3,493 (59.9)               | 30 (45.5)              |                       | 1,630 (59.4)               | 1,893 (60.0)              |                       |
| Female                                            | 2,369 (40.3)               | 8 (44.4)               |                       | 2,341 (40.1)               | 36 (54.5)              |                       | 1,115 (40.6)               | 1,262 (40.0)              |                       |
| Race and ethnicity, N (%)                         |                            |                        | 0.04                  |                            |                        | <0.001                |                            |                           | <0.001                |
| African American                                  | 1,650 (28.1)               | 10 (55.6)              |                       | 1,615 (27.7)               | 45 (68.2)              |                       | 649 (23.6)                 | 1,011 (32.0)              |                       |
| Japanese American                                 | 1,326 (22.5)               | 2 (11.1)               |                       | 1,323 (22.7)               | 5 (7.6)                |                       | 705 (25.7)                 | 623 (19.7)                |                       |
| Latino                                            | 796 (13.5)                 | 4 (22.2)               |                       | 796 (13.6)                 | 4 (6.1)                |                       | 349 (12.7)                 | 451 (14.3)                |                       |
| Native Hawaiian                                   | 532 (9.0)                  | 1 (5.6)                |                       | 527 (9.0)                  | 6 (9.1)                |                       | 263 (9.6)                  | 270 (8.6)                 |                       |
| White                                             | 1,578 (26.8)               | 1 (5.6)                |                       | 1,573 (27.0)               | 6 (9.1)                |                       | 779 (28.4)                 | 800 (25.4)                |                       |
| Education, N (%)                                  |                            |                        | <0.001                |                            |                        | <0.001                |                            |                           | 0.02                  |
| High school or less                               | 3,014 (51.2)               | 0 (0.0)                |                       | 2,965 (50.8)               | 49 (74.2)              |                       | 1,368 (49.8)               | 1,646 (52.2)              |                       |
| Some college or graduate                          | 2,382 (40.5)               | 0 (0.0)                |                       | 2,366 (40.6)               | 16 (24.2)              |                       | 1,111 (40.5)               | 1,271 (40.3)              |                       |
| Postgraduate                                      | 486 (8.3)                  | 0 (0.0)                |                       | 486 (8.3)                  | 0 (0.0)                |                       | 256 (9.3)                  | 230 (7.3)                 |                       |
| Unknown                                           | 0 (0.0)                    | 18 (100.0)             |                       | 17 (0.3)                   | 1 (1.5)                |                       | 10 (0.4)                   | 8 (0.3)                   |                       |
| Personal history of cancer, N (%)                 |                            |                        | 0.93                  |                            |                        | 0.04                  |                            |                           | <0.001                |
| No                                                | 4,359 (74.1)               | 14 (77.8)              |                       | 4,332 (74.3)               | 41 (62.1)              |                       | 1,971 (71.8)               | 2,402 (76.1)              |                       |
| Yes                                               | 1,523 (25.9)               | 4 (22.2)               |                       | 1,502 (25.7)               | 25 (37.9)              |                       | 774 (28.2)                 | 753 (23.9)                |                       |
| Family history of lung cancer, N (%)              |                            |                        | 0.92                  |                            |                        | 0.29                  |                            |                           | 0.89                  |
| No                                                | 5,352 (91.0)               | 17 (94.4)              |                       | 5,306 (90.9)               | 63 (95.5)              |                       | 2,500 (91.1)               | 2,869 (90.9)              |                       |
| Yes                                               | 530 (9.0)                  | 1 (5.6)                |                       | 528 (9.1)                  | 3 (4.5)                |                       | 245 (8.9)                  | 286 (9.1)                 |                       |
| COPD, N (%)                                       |                            |                        | 0.71                  |                            |                        | 0.44                  |                            |                           | <0.001                |
| No                                                | 1,213 (20.6)               | 4 (22.2)               |                       | 1,204 (20.6)               | 13 (19.7)              |                       | 1,217 (44.3)               | 0 (0.0)                   |                       |
| Yes                                               | 1,522 (25.9)               | 6 (33.3)               |                       | 1,515 (26.0)               | 13 (19.7)              |                       | 1,528 (55.7)               | 0 (0.0)                   |                       |
| Unknown                                           | 3,147 (53.5)               | 8 (44.4)               |                       | 3,115 (53.4)               | 40 (60.6)              |                       | 0 (0.0)                    | 3,155 (100.0)             |                       |
| Smoking status, N (%)                             |                            |                        | 0.18                  |                            |                        | 0.23                  |                            |                           | <0.001                |
| Former                                            | 3,065 (52.1)               | 6 (33.3)               |                       | 3,042 (52.1)               | 29 (43.9)              |                       | 1,521 (55.4)               | 1,550 (49.1)              |                       |
| Current                                           | 2,817 (47.9)               | 12 (66.7)              |                       | 2,792 (47.9)               | 37 (56.1)              |                       | 1,224 (44.6)               | 1,605 (50.9)              |                       |
| Pack-years, mean (SD)                             | 31.0 (18.5)                | 22.8 (18.5)            | 0.06                  | 31.1 (18.5)                | 23.2 (16.7)            | 0.001                 | 32.1 (19.0)                | 30.1 (18.0)               | <0.001                |
| Cigarettes per day, mean (SD)                     | 17.8 (8.7)                 | 14.6 (9.1)             | 0.13                  | 17.8 (8.7)                 | 13.8 (8.1)             | <0.001                | 18.0 (9.0)                 | 17.7 (8.5)                | 0.20                  |
| Quit years, median (IQR)                          | 0.5 (0-13)                 | 0.0 (0-12)             | 0.25                  | 0.5 (0-13)                 | 0.0 (0-8)              | 0.04                  | 1.5 (0-13)                 | 0.0 (0-13)                | <0.001                |
| Stage at diagnosis, N (%)                         |                            |                        | 0.06                  |                            |                        | 0.69                  |                            |                           | <0.001                |
| I-III                                             | 2,342 (39.8)               | 12 (66.7)              |                       | 2,331 (40.0)               | 23 (34.8)              |                       | 1,193 (43.5)               | 1,161 (36.8)              |                       |
| IV                                                | 3,178 (54.0)               | 5 (27.8)               |                       | 3,144 (53.9)               | 39 (59.1)              |                       | 1,372 (50.0)               | 1,811 (57.4)              |                       |
| Unknown                                           | 362 (6.2)                  | 1 (5.6)                |                       | 359 (6.2)                  | 4 (6.1)                |                       | 180 (6.6)                  | 183 (5.8)                 |                       |
| Histology, N (%)                                  |                            |                        | 0.49                  |                            |                        | 0.40                  |                            |                           | <0.001                |
| Adenocarcinoma                                    | 2,180 (37.1)               | 6 (33.3)               |                       | 2,168 (37.2)               | 18 (27.3)              |                       | 1,071 (39.0)               | 1,115 (35.3)              |                       |
| Squamous cell carcinoma                           | 1,288 (21.9)               | 7 (38.9)               |                       | 1,281 (22.0)               | 14 (21.2)              |                       | 611 (22.3)                 | 684 (21.7)                |                       |
| Large cell carcinoma                              | 180 (3.1)                  | 0 (0.0)                |                       | 179 (3.1)                  | 1 (1.5)                |                       | 69 (2.5)                   | 111 (3.5)                 |                       |
| Small cell lung carcinoma                         | 668 (11.4)                 | 2 (11.1)               |                       | 659 (11.3)                 | 11 (16.7)              |                       | 293 (10.7)                 | 377 (11.9)                |                       |
| Non-small cell lung carcinoma NOS                 | 463 (7.9)                  | 0 (0.0)                |                       | 457 (7.8)                  | 6 (9.1)                |                       | 244 (8.9)                  | 219 (6.9)                 |                       |
| Other                                             | 1,103 (18.8)               | 3 (16.7)               |                       | 1,090 (18.7)               | 16 (24.2)              |                       | 457 (16.6)                 | 649 (20.6)                |                       |

Abbreviations: *BMI* body mass index, *COPD* chronic obstructive pulmonary disease, *N* sample size, *SD* standard deviation, *kg* kilogram, *m* meter, *NE* not estimable, *IQR* interquartile range, *NOS* not otherwise specified.

<sup>a</sup> P-value was calculated for categorical data using the chi-square test and for continuous data using one-way analysis of variance.

<sup>b</sup> BMI was unknown in 65 (1.1%) participants with complete and 1 (5.6%) participant with missing education data (P=0.503, chi-square test) and in 26 (0.9%) participants with complete and 40 (1.3%) participants with missing COPD data (P=0.30, chi-square test)



**Supplementary Table 5.** 2013 USPSTF Criteria Eligibility (i.e., Screening Sensitivity) and Sources of Ineligibility among All and Ineligible Lung Cancer Cases by Race and Ethnicity.

| Source                                            | Overall      | African American | Japanese American | Latino     | Native Hawaiian | White      |
|---------------------------------------------------|--------------|------------------|-------------------|------------|-----------------|------------|
| All Lung Cancer Cases, N                          | 5,900        | 1,660            | 1,328             | 800        | 533             | 1,579      |
| Age < 55 years                                    | 108 (1.8)    | 41 (2.5)         | 12 (0.9)          | 4 (0.5)    | 20 (3.8)        | 31 (2.0)   |
| Age > 80 years                                    | 1,454 (24.6) | 393 (23.7)       | 413 (31.1)        | 216 (27.0) | 71 (13.3)       | 361 (22.9) |
| Pack-years < 30                                   | 2,626 (44.5) | 981 (59.1)       | 519 (39.1)        | 434 (54.2) | 212 (39.8)      | 480 (30.4) |
| Quit years > 15                                   | 1,998 (33.9) | 457 (27.5)       | 560 (42.2)        | 294 (36.8) | 120 (22.5)      | 567 (35.9) |
| Eligible Lung Cancer Cases, N (% <sup>a</sup> )   | 2,068 (35.1) | 460 (27.7)       | 443 (33.4)        | 231 (28.9) | 247 (46.3)      | 687 (43.5) |
| Ineligible Lung Cancer Cases, N (% <sup>a</sup> ) | 3,832 (64.9) | 1,200 (72.3)     | 885 (66.6)        | 569 (71.1) | 286 (53.7)      | 892 (56.5) |
| Age < 55 years                                    | 108 (2.8)    | 41 (3.4)         | 12 (1.4)          | 4 (0.7)    | 20 (7.0)        | 31 (3.5)   |
| Age > 80 years                                    | 1,454 (37.9) | 393 (32.8)       | 413 (46.7)        | 216 (38.0) | 71 (24.8)       | 361 (40.5) |
| Pack-years < 30                                   | 2,626 (68.5) | 981 (81.8)       | 519 (58.6)        | 434 (76.3) | 212 (74.1)      | 480 (53.8) |
| Quit years > 15                                   | 1,998 (52.1) | 457 (38.1)       | 560 (63.3)        | 294 (51.7) | 120 (42.0)      | 567 (63.6) |

Abbreviations: *USPSTF* United States Preventive Services Task Force, *N* sample size.

<sup>a</sup> Percentages correspond to the number of eligible or ineligible lung cancer cases divided by all lung cancer cases overall and within each race or ethnicity stratum.

**Supplementary Table 6.** Screening Eligibilities (i.e., Screening Sensitivities) and Racial and Ethnic Disparities through Risk-Based Screening and the USPSTF Criteria Among Complete Cases.

| Screening Assessment                               | Overall      | African American | Japanese American | Latino     | Native Hawaiian | White      | P <sup>a</sup> |
|----------------------------------------------------|--------------|------------------|-------------------|------------|-----------------|------------|----------------|
|                                                    | N=2,710      | N=625            | N=700             | N=345      | N=262           | N=778      |                |
| SCREENING ELIGIBILITY/SCREENING SENSITIVITY, N (%) |              |                  |                   |            |                 |            |                |
| RBS: risk $\geq$ 1.51%                             | 2,093 (77.2) | 499 (79.8)       | 502 (71.7)        | 180 (52.2) | 248 (94.7)      | 664 (85.3) | <0.001         |
| 2021 USPSTF                                        | 1,075 (39.7) | 233 (37.3)       | 246 (35.1)        | 111 (32.2) | 147 (56.1)      | 338 (43.4) | <0.001         |
| RACIAL AND ETHNIC DISPARITY, %                     |              |                  |                   |            |                 |            |                |
| RBS: risk $\geq$ 1.51%                             | -            | 5.5              | 13.6              | 33.1       | -9.4            | Ref        |                |
| 2021 USPSTF                                        | -            | 6.1              | 8.3               | 11.2       | -12.7           | Ref        |                |

Risk-based screening was evaluated through the PLCO<sub>m2012</sub> model. Racial and ethnic disparity is defined as the absolute difference in screening sensitivities between each racial and ethnic group and White.

Abbreviations: *USPSTF* United States Preventive Services Task Force, *N* sample size, *RBS* risk-based screening.

<sup>a</sup> P-value was calculated across racial and ethnic strata using the chi-square test.

**Supplementary Table 7.** Screening Eligibilities (i.e., Screening Sensitivities) and Racial and Ethnic Disparities through Risk-Based Screening and the USPSTF Criteria Utilizing a Conservative COPD Analysis in the Primary Study Cohort.

| Screening Assessment                                      | Overall<br>N=5,900 | African American<br>N=1,660 | Japanese American<br>N=1,328 | Latino<br>N=800 | Native Hawaiian<br>N=533 | White<br>N=1,579 | P <sup>a</sup> |
|-----------------------------------------------------------|--------------------|-----------------------------|------------------------------|-----------------|--------------------------|------------------|----------------|
| <b>SCREENING ELIGIBILITY/SCREENING SENSITIVITY, N (%)</b> |                    |                             |                              |                 |                          |                  |                |
| <b>Risk-based Screening</b>                               |                    |                             |                              |                 |                          |                  |                |
| Risk ≥ 1.51%                                              | 4,251 (72.1)       | 1,238 (74.6)                | 889 (66.9)                   | 378 (47.2)      | 476 (89.3)               | 1,270 (80.4)     | <0.001         |
| Risk ≥ 1.7%                                               | 4,088 (69.3)       | 1,200 (72.3)                | 845 (63.6)                   | 349 (43.6)      | 471 (88.4)               | 1,223 (77.5)     | <0.001         |
| Risk ≥ 2.0%                                               | 3,816 (64.7)       | 1,134 (68.3)                | 769 (57.9)                   | 306 (38.2)      | 452 (84.8)               | 1,155 (73.1)     | <0.001         |
| <b>USPSTF Criteria</b>                                    |                    |                             |                              |                 |                          |                  |                |
| 2013 USPSTF                                               | 2,068 (35.1)       | 460 (27.7)                  | 443 (33.4)                   | 231 (28.9)      | 247 (46.3)               | 687 (43.5)       | <0.001         |
| 2021 USPSTF                                               | 2,552 (43.3)       | 638 (38.4)                  | 531 (40.0)                   | 298 (37.2)      | 302 (56.7)               | 783 (49.6)       | <0.001         |
| <b>Alternate USPSTF Strategies</b>                        |                    |                             |                              |                 |                          |                  |                |
| 55-80/20/15                                               | 2,491 (42.2)       | 624 (37.6)                  | 521 (39.2)                   | 296 (37.0)      | 294 (55.2)               | 756 (47.9)       | <0.001         |
| 55-80/20/20                                               | 2,731 (46.3)       | 671 (40.4)                  | 577 (43.4)                   | 330 (41.2)      | 318 (59.7)               | 835 (52.9)       | <0.001         |
| 55-80/20/25                                               | 2,903 (49.2)       | 697 (42.0)                  | 638 (48.0)                   | 349 (43.6)      | 329 (61.7)               | 890 (56.4)       | <0.001         |
| 50-80/20/20                                               | 2,792 (47.3)       | 685 (41.3)                  | 587 (44.2)                   | 332 (41.5)      | 326 (61.2)               | 862 (54.6)       | <0.001         |
| 50-80/20/25                                               | 2,964 (50.2)       | 711 (42.8)                  | 648 (48.8)                   | 351 (43.9)      | 337 (63.2)               | 917 (58.1)       | <0.001         |
| <b>RACIAL AND ETHNIC DISPARITY, %</b>                     |                    |                             |                              |                 |                          |                  |                |
| <b>Risk-based Screening</b>                               |                    |                             |                              |                 |                          |                  |                |
| Risk ≥ 1.51%                                              | -                  | 5.8                         | 13.5                         | 33.2            | -8.9                     | Ref              |                |
| Risk ≥ 1.7%                                               | -                  | 5.2                         | 13.9                         | 33.9            | -10.9                    | Ref              |                |
| Risk ≥ 2.0%                                               | -                  | 4.8                         | 15.2                         | 34.9            | -11.7                    | Ref              |                |
| <b>USPSTF Criteria</b>                                    |                    |                             |                              |                 |                          |                  |                |
| 2013 USPSTF                                               | -                  | 15.8                        | 10.1                         | 14.6            | -2.8                     | Ref              |                |
| 2021 USPSTF                                               | -                  | 11.2                        | 9.6                          | 12.4            | -7.1                     | Ref              |                |
| <b>Alternate USPSTF Strategies</b>                        |                    |                             |                              |                 |                          |                  |                |
| 55-80/20/15                                               | -                  | 10.3                        | 8.7                          | 10.9            | -7.3                     | Ref              |                |
| 55-80/20/20                                               | -                  | 12.5                        | 9.5                          | 11.7            | -6.8                     | Ref              |                |
| 55-80/20/25                                               | -                  | 14.4                        | 8.4                          | 12.8            | -5.3                     | Ref              |                |
| 50-80/20/20                                               | -                  | 13.3                        | 10.4                         | 13.1            | -6.6                     | Ref              |                |
| 50-80/20/25                                               | -                  | 15.3                        | 9.3                          | 14.2            | -5.1                     | Ref              |                |

In the conservative COPD analysis, participants with missing COPD data were assigned null values (i.e., no history of COPD) when calculating the PLCO<sub>m2012</sub> risk scores. Risk-based screening was evaluated through the PLCO<sub>m2012</sub> model. Racial and ethnic disparity is defined as the absolute difference in screening sensitivities between each racial or ethnic group and White. Abbreviations: *USPSTF* United States Preventive Services Task Force, *N* sample size.

<sup>a</sup> P-value was calculated across race and ethnicity strata using the chi-square test.

**Supplementary Table 8.** Screening Eligibilities (i.e., Screening Sensitivities) and Racial and Ethnic Disparities through Risk-Based Screening and the USPSTF Criteria in the Primary Study Cohort Using a Modified PLCO<sub>m2012</sub> Model.

| Screening Assessment                                      | Overall<br>N=5,900 | African American<br>N=1,660 | Japanese American<br>N=1,328 | Latino<br>N=800 | Native Hawaiian<br>N=533 | White<br>N=1,579 | P <sup>a</sup> |
|-----------------------------------------------------------|--------------------|-----------------------------|------------------------------|-----------------|--------------------------|------------------|----------------|
| <b>SCREENING ELIGIBILITY/SCREENING SENSITIVITY, N (%)</b> |                    |                             |                              |                 |                          |                  |                |
| <b>Risk-based Screening</b>                               |                    |                             |                              |                 |                          |                  |                |
| Risk ≥ 1.51%                                              | 4,674 (79.2)       | 1,273 (76.7)                | 1,060 (79.8)                 | 547 (68.4)      | 490 (91.9)               | 1,304 (82.6)     | <0.001         |
| Risk ≥ 1.7%                                               | 4,558 (77.3)       | 1,241 (74.8)                | 1,038 (78.2)                 | 533 (66.6)      | 480 (90.1)               | 1,266 (80.2)     | <0.001         |
| Risk ≥ 2.0%                                               | 4,353 (73.8)       | 1,184 (71.3)                | 993 (74.8)                   | 509 (63.6)      | 463 (86.9)               | 1,204 (76.3)     | <0.001         |
| <b>USPSTF Criteria</b>                                    |                    |                             |                              |                 |                          |                  |                |
| 2013 USPSTF                                               | 2,068 (35.1)       | 460 (27.7)                  | 443 (33.4)                   | 231 (28.9)      | 247 (46.3)               | 687 (43.5)       | <0.001         |
| 2021 USPSTF                                               | 2,552 (43.3)       | 638 (38.4)                  | 531 (40.0)                   | 298 (37.3)      | 302 (56.7)               | 783 (49.6)       | <0.001         |
| <b>Alternate USPSTF Strategies</b>                        |                    |                             |                              |                 |                          |                  |                |
| 55-80/20/15                                               | 2,491 (42.2)       | 624 (37.6)                  | 521 (39.2)                   | 296 (37.0)      | 294 (55.2)               | 756 (47.9)       | <0.001         |
| 55-80/20/20                                               | 2,731 (46.3)       | 671 (40.4)                  | 577 (43.4)                   | 330 (41.2)      | 318 (59.7)               | 835 (52.9)       | <0.001         |
| 55-80/20/25                                               | 2,903 (49.2)       | 697 (42.0)                  | 638 (48.0)                   | 349 (43.6)      | 329 (61.7)               | 890 (56.4)       | <0.001         |
| 50-80/20/20                                               | 2,792 (47.3)       | 685 (41.3)                  | 587 (44.2)                   | 332 (41.5)      | 326 (61.2)               | 862 (54.6)       | <0.001         |
| 50-80/20/25                                               | 2,964 (50.2)       | 711 (42.8)                  | 648 (48.8)                   | 351 (43.9)      | 337 (63.2)               | 917 (58.1)       | <0.001         |
| <b>RACIAL AND ETHNIC DISPARITY, %</b>                     |                    |                             |                              |                 |                          |                  |                |
| <b>Risk-based Screening</b>                               |                    |                             |                              |                 |                          |                  |                |
| Risk ≥ 1.51%                                              | -                  | 5.9                         | 2.8                          | 14.2            | -9.3                     | Ref              |                |
| Risk ≥ 1.7%                                               | -                  | 5.4                         | 2.0                          | 13.6            | -9.9                     | Ref              |                |
| Risk ≥ 2.0%                                               | -                  | 5.0                         | 1.5                          | 12.7            | -10.6                    | Ref              |                |
| <b>USPSTF Criteria</b>                                    |                    |                             |                              |                 |                          |                  |                |
| 2013 USPSTF                                               | -                  | 15.8                        | 10.1                         | 14.6            | -2.8                     | Ref              |                |
| 2021 USPSTF                                               | -                  | 11.2                        | 9.6                          | 12.4            | -7.1                     | Ref              |                |
| <b>Alternate USPSTF Strategies</b>                        |                    |                             |                              |                 |                          |                  |                |
| 55-80/20/15                                               | -                  | 10.3                        | 8.7                          | 10.9            | -7.3                     | Ref              |                |
| 55-80/20/20                                               | -                  | 12.5                        | 9.5                          | 11.7            | -6.8                     | Ref              |                |
| 55-80/20/25                                               | -                  | 14.4                        | 8.4                          | 12.8            | -5.3                     | Ref              |                |
| 50-80/20/20                                               | -                  | 13.3                        | 10.4                         | 13.1            | -6.6                     | Ref              |                |
| 50-80/20/25                                               | -                  | 15.3                        | 9.3                          | 14.2            | -5.1                     | Ref              |                |

Risk-based screening was evaluated through a modified PLCO<sub>m2012</sub> model in which the positive beta coefficients for the African American (beta=0.394) and Native Hawaiian (beta=1.027152) groups are retained but all other racial and ethnic groups (beta=0.000) equal the Non-Hispanic White group (the reference group). Racial and ethnic disparity is defined as the absolute difference in screening sensitivities between each racial or ethnic group and White. Abbreviations: USPSTF United States Preventive Services Task Force, N sample size.

<sup>a</sup> P-value was calculated across racial and ethnic strata using the chi-square test.

**Supplementary Table 9.** Screening Eligibilities (i.e., Screening Sensitivities) and Racial and Ethnic Disparities through Risk-Based Screening and the USPSTF Criteria in the Primary Study Cohort 6 Years Prior to Lung Cancer Diagnosis Using a Modified PLCO<sub>m2012</sub> Model.

| Screening Assessment                                      | Overall<br>N=5,900 | African American<br>N=1,660 | Japanese American<br>N=1,328 | Latino<br>N=800 | Native Hawaiian<br>N=533 | White<br>N=1,579 | P <sup>a</sup> |
|-----------------------------------------------------------|--------------------|-----------------------------|------------------------------|-----------------|--------------------------|------------------|----------------|
| <b>SCREENING ELIGIBILITY/SCREENING SENSITIVITY, N (%)</b> |                    |                             |                              |                 |                          |                  |                |
| <b>Risk-based Screening</b>                               |                    |                             |                              |                 |                          |                  |                |
| Risk ≥ 1.51%                                              | 3,980 (67.5)       | 1,067 (64.3)                | 909 (68.4)                   | 460 (57.5)      | 442 (82.9)               | 1,102 (69.8)     | <0.001         |
| Risk ≥ 1.7%                                               | 3,790 (64.2)       | 1,019 (61.4)                | 856 (64.5)                   | 422 (52.8)      | 430 (80.7)               | 1,063 (67.3)     | <0.001         |
| Risk ≥ 2.0%                                               | 3,503 (59.4)       | 942 (56.7)                  | 792 (59.6)                   | 385 (48.1)      | 420 (78.8)               | 964 (61.1)       | <0.001         |
| <b>USPSTF Criteria</b>                                    |                    |                             |                              |                 |                          |                  |                |
| 2013 USPSTF                                               | 2,081 (35.3)       | 421 (25.4)                  | 500 (37.7)                   | 250 (31.3)      | 201 (37.7)               | 709 (44.9)       | <0.001         |
| 2021 USPSTF                                               | 3,055 (51.8)       | 729 (43.9)                  | 697 (52.5)                   | 357 (44.6)      | 321 (60.2)               | 951 (60.2)       | <0.001         |
| <b>Alternate USPSTF Strategies</b>                        |                    |                             |                              |                 |                          |                  |                |
| 55-80/20/15                                               | 2,874 (48.7)       | 701 (42.2)                  | 661 (49.8)                   | 348 (43.5)      | 281 (52.7)               | 883 (55.9)       | <0.001         |
| 55-80/20/20                                               | 3,118 (52.8)       | 739 (44.5)                  | 739 (55.6)                   | 374 (46.8)      | 298 (55.9)               | 968 (61.3)       | <0.001         |
| 55-80/20/25                                               | 3,247 (55.0)       | 754 (45.4)                  | 786 (59.2)                   | 388 (48.5)      | 305 (57.2)               | 1,014 (64.2)     | <0.001         |
| 50-80/20/20                                               | 3,299 (55.9)       | 767 (46.2)                  | 775 (58.4)                   | 383 (47.9)      | 338 (63.4)               | 1,036 (65.6)     | <0.001         |
| 50-80/20/25                                               | 3,428 (58.1)       | 782 (47.1)                  | 822 (61.9)                   | 397 (49.6)      | 345 (64.7)               | 1,082 (68.5)     | <0.001         |
| <b>RACIAL AND ETHNIC DISPARITY, %</b>                     |                    |                             |                              |                 |                          |                  |                |
| <b>Risk-based Screening</b>                               |                    |                             |                              |                 |                          |                  |                |
| Risk ≥ 1.51%                                              | -                  | 5.5                         | 1.4                          | 12.3            | -13.1                    | Ref              |                |
| Risk ≥ 1.7%                                               | -                  | 5.9                         | 2.8                          | 14.5            | -13.4                    | Ref              |                |
| Risk ≥ 2.0%                                               | -                  | 4.4                         | 1.5                          | 13.0            | -17.7                    | Ref              |                |
| <b>USPSTF Criteria</b>                                    |                    |                             |                              |                 |                          |                  |                |
| 2013 USPSTF                                               | -                  | 19.5                        | 7.2                          | 13.6            | 7.2                      | Ref              |                |
| 2021 USPSTF                                               | -                  | 16.3                        | 7.7                          | 15.6            | 0.0                      | Ref              |                |
| <b>Alternate USPSTF Strategies</b>                        |                    |                             |                              |                 |                          |                  |                |
| 55-80/20/15                                               | -                  | 13.7                        | 6.1                          | 12.4            | 3.2                      | Ref              |                |
| 55-80/20/20                                               | -                  | 16.8                        | 5.7                          | 14.5            | 5.4                      | Ref              |                |
| 55-80/20/25                                               | -                  | 18.8                        | 5.0                          | 15.7            | 7.0                      | Ref              |                |
| 50-80/20/20                                               | -                  | 19.4                        | 7.2                          | 17.7            | 2.2                      | Ref              |                |
| 50-80/20/25                                               | -                  | 21.4                        | 6.6                          | 18.9            | 3.8                      | Ref              |                |

Risk-based screening was evaluated through a modified PLCO<sub>m2012</sub> model in which the positive beta coefficients for the African American (beta=0.394) and Native Hawaiian (beta=1.027152) groups are retained but all other racial and ethnic groups (beta=0.000) equal the Non-Hispanic White group (the reference group). Racial and ethnic disparity is defined as the absolute difference in screening sensitivities between each racial or ethnic group and White. Abbreviations: *USPSTF* United States Preventive Services Task Force, *N* sample size.

<sup>a</sup> P-value was calculated across racial and ethnic strata using the chi-square test.
